# Supplementary material for: Effects of Phenolic Phytogenic Feed Additives on Certain Oxidative Damage Biomarkers and the Performance of Primiparous Sows Exposed to Heat Stress under Field Conditions
Source: MDPI journal article supplement (doi:10.3390/antiox11030593), 2022-03-20
Supplement: s1 [file s1]

**Table S3:** Mean, standard error (SE), median, interquartile range (IQR) and *p* value of sow body condition parameters and comparison between the groups.

| <b>Reproductive indicator</b> | <b>Group</b> | <b>N</b> | <b>Mean</b> | <b>SE</b> | <b>Median</b>        | <b>IQR</b>   | <b><i>p</i> value</b> |
|-------------------------------|--------------|----------|-------------|-----------|----------------------|--------------|-----------------------|
| <b>Backfat at farrowing</b>   | T1           | 16       | 17.31       | 0.25      | 17.00                | 16.50- 18.00 | 0.90                  |
|                               | T2           | 16       | 17.06       | 0.25      | 17.00                | 17.00- 18.00 |                       |
|                               | T3           | 16       | 17.19       | 0.25      | 17.00                | 17.00- 18.00 |                       |
| <b>Backfat at weaning</b>     | T1           | 16       | 12.69       | 0.20      | 12.50 <sup>b</sup>   | 12.00- 13.00 | 0.04                  |
|                               | T2           | 16       | 13.31       | 0.15      | 13.00 <sup>a</sup>   | 13.00-14.00  |                       |
|                               | T3           | 16       | 13.19       | 0.19      | 13.00 <sup>a,b</sup> | 13.00- 13.50 |                       |
| <b>BCS at farrowing</b>       | T1           | 16       | 4.19        | 0.14      | 4.00                 | 4.00- 4.50   | 0.15                  |
|                               | T2           | 16       | 3.88        | 0.18      | 4.00                 | 3.00- 4.00   |                       |
|                               | T3           | 16       | 3.75        | 0.17      | 4.00                 | 3.00- 4.00   |                       |
| <b>BCS - weaning day</b>      | T1           | 16       | 2.31        | 0.12      | 2.00 <sup>b</sup>    | 2.00- 3.00   | 0.02                  |
|                               | T2           | 16       | 2.94        | 0.17      | 3.00 <sup>a</sup>    | 2.50- 3.00   |                       |
|                               | T3           | 16       | 3.06        | 0.14      | 3.00 <sup>a</sup>    | 3.00- 3.00   |                       |

\*Figures with different superscripts are indicative of a statistically significant difference (*p* value < 0.05).
