# Supplementary material for: Effects of Phenolic Phytogenic Feed Additives on Certain Oxidative Damage Biomarkers and the Performance of Primiparous Sows Exposed to Heat Stress under Field Conditions
Source: MDPI journal article supplement (doi:10.3390/antiox11030593), 2022-03-20
Supplement: s1 [file s1]

**Table S4:** Mean, standard error (SE), median, interquartile range (IQR) and *p* value of TBARS and CARB values and comparison between the groups.

| Parameter                                       | Group | N | Mean  | SE   | Median              | IQR          | <i>p</i> value |
|-------------------------------------------------|-------|---|-------|------|---------------------|--------------|----------------|
| <b>TBARS<br/>(<math>\mu\text{mol/L}</math>)</b> | T1    | 5 | 18.23 | 0.66 | 17.55 <sup>a</sup>  | 17.14- 19.74 | 0.009          |
|                                                 | T2    | 5 | 15.09 | 0.36 | 14.90 <sup>b</sup>  | 14.54- 15.86 |                |
|                                                 | T3    | 5 | 15.08 | 0.30 | 14.97 <sup>b</sup>  | 14.71- 15.70 |                |
| <b>CARB<br/>(nmol/mL)</b>                       | T1    | 5 | 24.82 | 1.02 | 23.64 <sup>a</sup>  | 23.07- 27.05 | 0.006          |
|                                                 | T2    | 5 | 19.36 | 0.68 | 19.091 <sup>b</sup> | 18.41- 20.11 |                |
|                                                 | T3    | 5 | 18.27 | 0.27 | 18.18 <sup>b</sup>  | 17.73- 18.75 |                |
| <b>CARB<br/>(nmol/mg<br/>protein)</b>           | T1    | 5 | 0.35  | 0.01 | 0.34 <sup>a</sup>   | 0.33- 0.39   | 0.006          |
|                                                 | T2    | 5 | 0.28  | 0.01 | 0.27 <sup>b</sup>   | 0.26- 0.29   |                |
|                                                 | T3    | 5 | 0.26  | 0.01 | 0.26 <sup>b</sup>   | 0.25-0.27    |                |

\*Figures with different superscripts are indicative of a statistically significant difference (*p* value < 0.05).
