# Supplementary material for: Effects of Phenolic Phytogenic Feed Additives on Certain Oxidative Damage Biomarkers and the Performance of Primiparous Sows Exposed to Heat Stress under Field Conditions
Source: MDPI journal article supplement (doi:10.3390/antiox11030593), 2022-03-20
Supplement: s1 [file s1]

**Table S2:** Mean, standard error (SE), median, interquartile range (IQR) and *p* value of the reproductive parameters and litter characteristics and comparison between the groups.

| <b>Reproductive indicator</b>      | <b>Group</b> | <b>N</b> | <b>Mean</b> | <b>SE</b> | <b>Median</b>       | <b>IQR</b>   | <b><i>p</i> value</b> |
|------------------------------------|--------------|----------|-------------|-----------|---------------------|--------------|-----------------------|
| <b>Total born</b>                  | T1           | 16       | 16.56       | 0.86      | 16.50               | 13.00- 20.00 | 0.95                  |
|                                    | T2           | 16       | 15.88       | 0.38      | 15.50               | 15.00- 17.00 |                       |
|                                    | T3           | 16       | 16.56       | 0.79      | 15.50               | 15.00- 17.50 |                       |
| <b>Born alive</b>                  | T1           | 16       | 15.62       | 0.67      | 16.50               | 13.00- 18.00 | 0.99                  |
|                                    | T2           | 16       | 15.43       | 0.32      | 15.00               | 14.50- 16.50 |                       |
|                                    | T3           | 16       | 15.88       | 0.64      | 15.00               | 14.00- 16.50 |                       |
| <b>Stillborn</b>                   | T1           | 16       | 2.13        | 0.38      | 2.00 <sup>a</sup>   | 1.00- 3.00   | 0.03                  |
|                                    | T2           | 16       | 0.94        | 0.27      | 1.00 <sup>b</sup>   | 0.00- 1.50   |                       |
|                                    | T3           | 16       | 1.06        | 0.23      | 1.00 <sup>b</sup>   | 0.50- 1.00   |                       |
| <b>Mummies</b>                     | T1           | 16       | 0.75        | 0.23      | 0.50                | 0.00- 1.00   | 0.97                  |
|                                    | T2           | 16       | 0.56        | 0.13      | 1.00                | 0.00- 1.00   |                       |
|                                    | T3           | 16       | 0.63        | 0.18      | 0.50                | 0.00- 1.00   |                       |
| <b>Alive &gt;24h</b>               | T1           | 16       | 13.50       | 0.48      | 13.00 <sup>b</sup>  | 12.00- 15.00 | 0.04                  |
|                                    | T2           | 16       | 14.94       | 0.31      | 15.00 <sup>a</sup>  | 14.00- 15.00 |                       |
|                                    | T3           | 16       | 15.19       | 0.59      | 14.00 <sup>a</sup>  | 14.00- 16.00 |                       |
| <b>Weaning</b>                     | T1           | 16       | 12.56       | 0.24      | 13.00 <sup>b</sup>  | 12.00- 13.00 | <0.01                 |
|                                    | T2           | 16       | 14.19       | 0.14      | 14.00 <sup>a</sup>  | 14.00- 14.50 |                       |
|                                    | T3           | 16       | 14.06       | 0.21      | 14.00 <sup>a</sup>  | 14.00- 15.00 |                       |
| <b>Mean BW of weaning</b>          | T1           | 16       | 7.46        | 0.13      | 7.50                | 6.90- 7.90   | 0.32                  |
|                                    | T2           | 16       | 7.64        | 0.16      | 7.50                | 7.20- 8.20   |                       |
|                                    | T3           | 16       | 7.75        | 0.12      | 7.65                | 7.35- 8.20   |                       |
| <b>Weaning to oestrus interval</b> | T1           | 16       | 6.19        | 0.23      | 6.00 <sup>a</sup>   | 5.00- 7.00   | 0.03                  |
|                                    | T2           | 16       | 5.63        | 0.15      | 6.00 <sup>a,b</sup> | 5.00- 6.00   |                       |
|                                    | T3           | 16       | 5.38        | 0.18      | 5.00 <sup>b</sup>   | 5.00- 6.00   |                       |

\*Figures with different superscripts are indicative of a statistically significant difference (*p* value < 0.05).
